# Supplementary material for: Phylogenetic Affiliation of SSU rRNA Genes Generated by Massively Parallel Sequencing: New Insights into the Freshwater Protist Diversity
Source: PubMed Central journal article supplement (PMC3597552; doi:10.1371/journal.pone.0058950), 2013-03-14
Supplement: pone.0058950.s001.pdf [file pone.0058950.s001.pdf]

A.

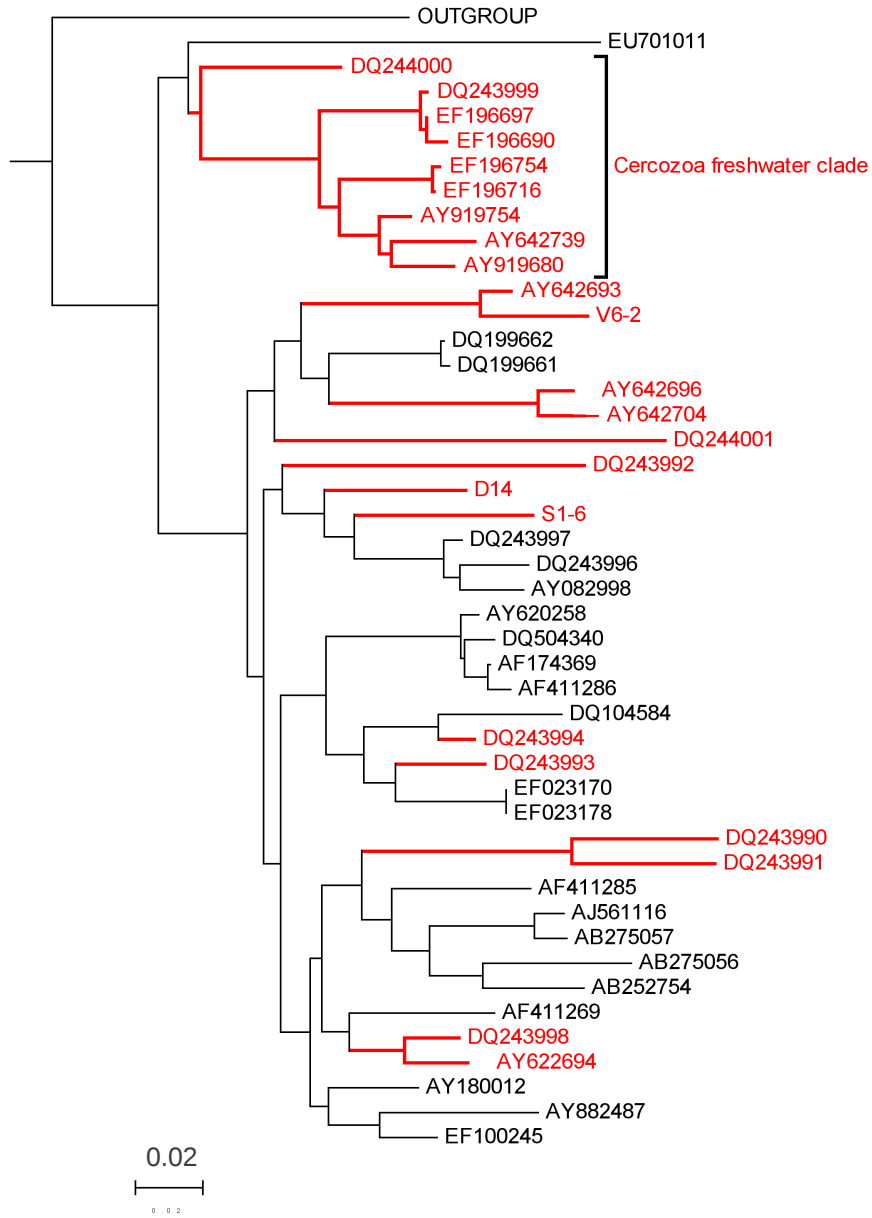

B.

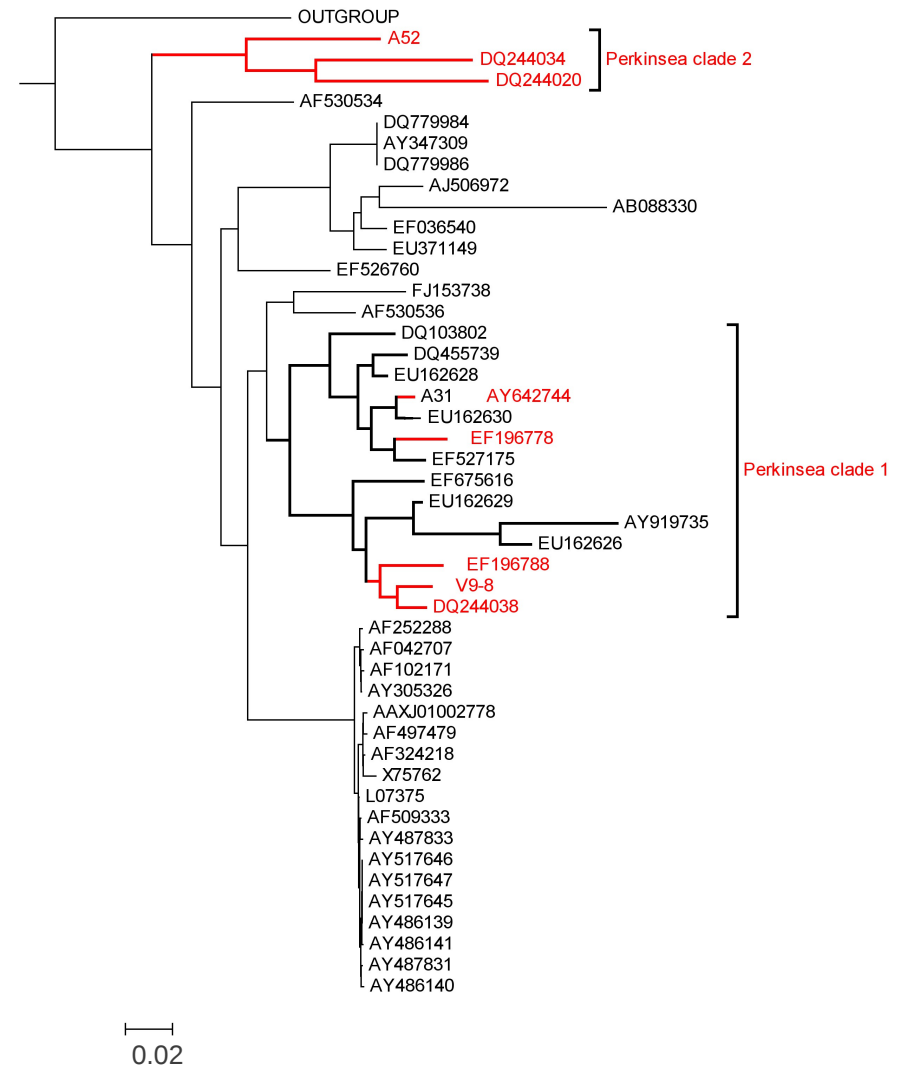

Fig. S1: The *Cercozoa* (A) and *Perkinsea* (B) phylogenies generated by PANAM after inserting environmental sequences. Inserted environmental sequences are in color (sequences with no accession number have been deposited in GenBank).
