# Supplementary material for: Phylogenetic Affiliation of SSU rRNA Genes Generated by Massively Parallel Sequencing: New Insights into the Freshwater Protist Diversity
Source: PubMed Central journal article supplement (PMC3597552; doi:10.1371/journal.pone.0058950), 2013-03-14
Supplement: pone.0058950.s002.pdf [file pone.0058950.s002.pdf]

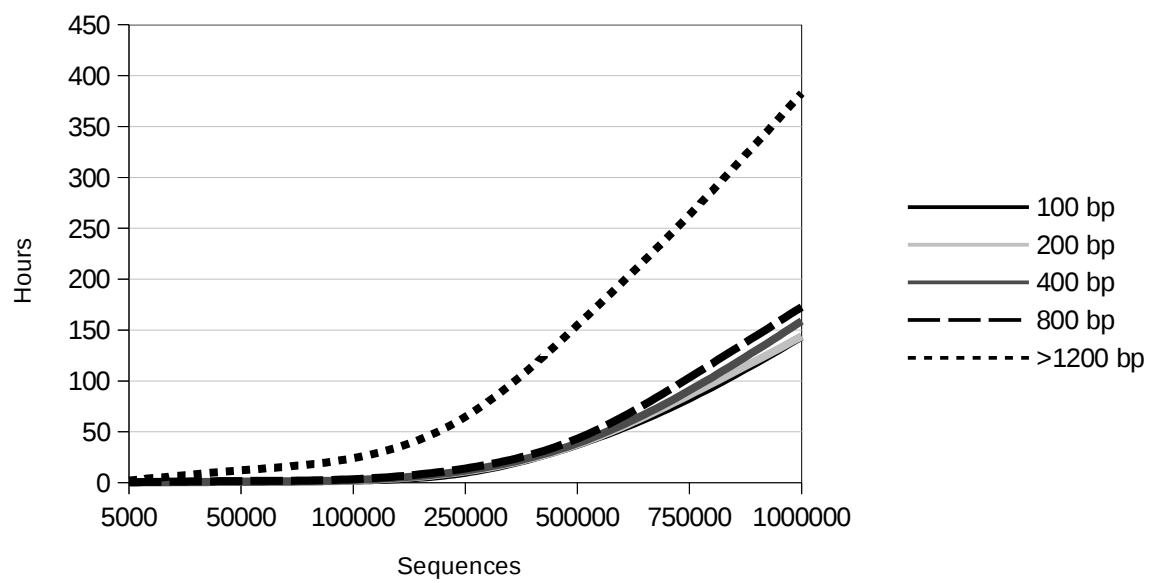

Fig. S2: Processing time of PANAM-LCA depending on the number and length of reads.
