# Supplementary material for: Phylogenetic Affiliation of SSU rRNA Genes Generated by Massively Parallel Sequencing: New Insights into the Freshwater Protist Diversity
Source: PubMed Central journal article supplement (PMC3597552; doi:10.1371/journal.pone.0058950), 2013-03-14
Supplement: pone.0058950.s003.pdf [file pone.0058950.s003.pdf]

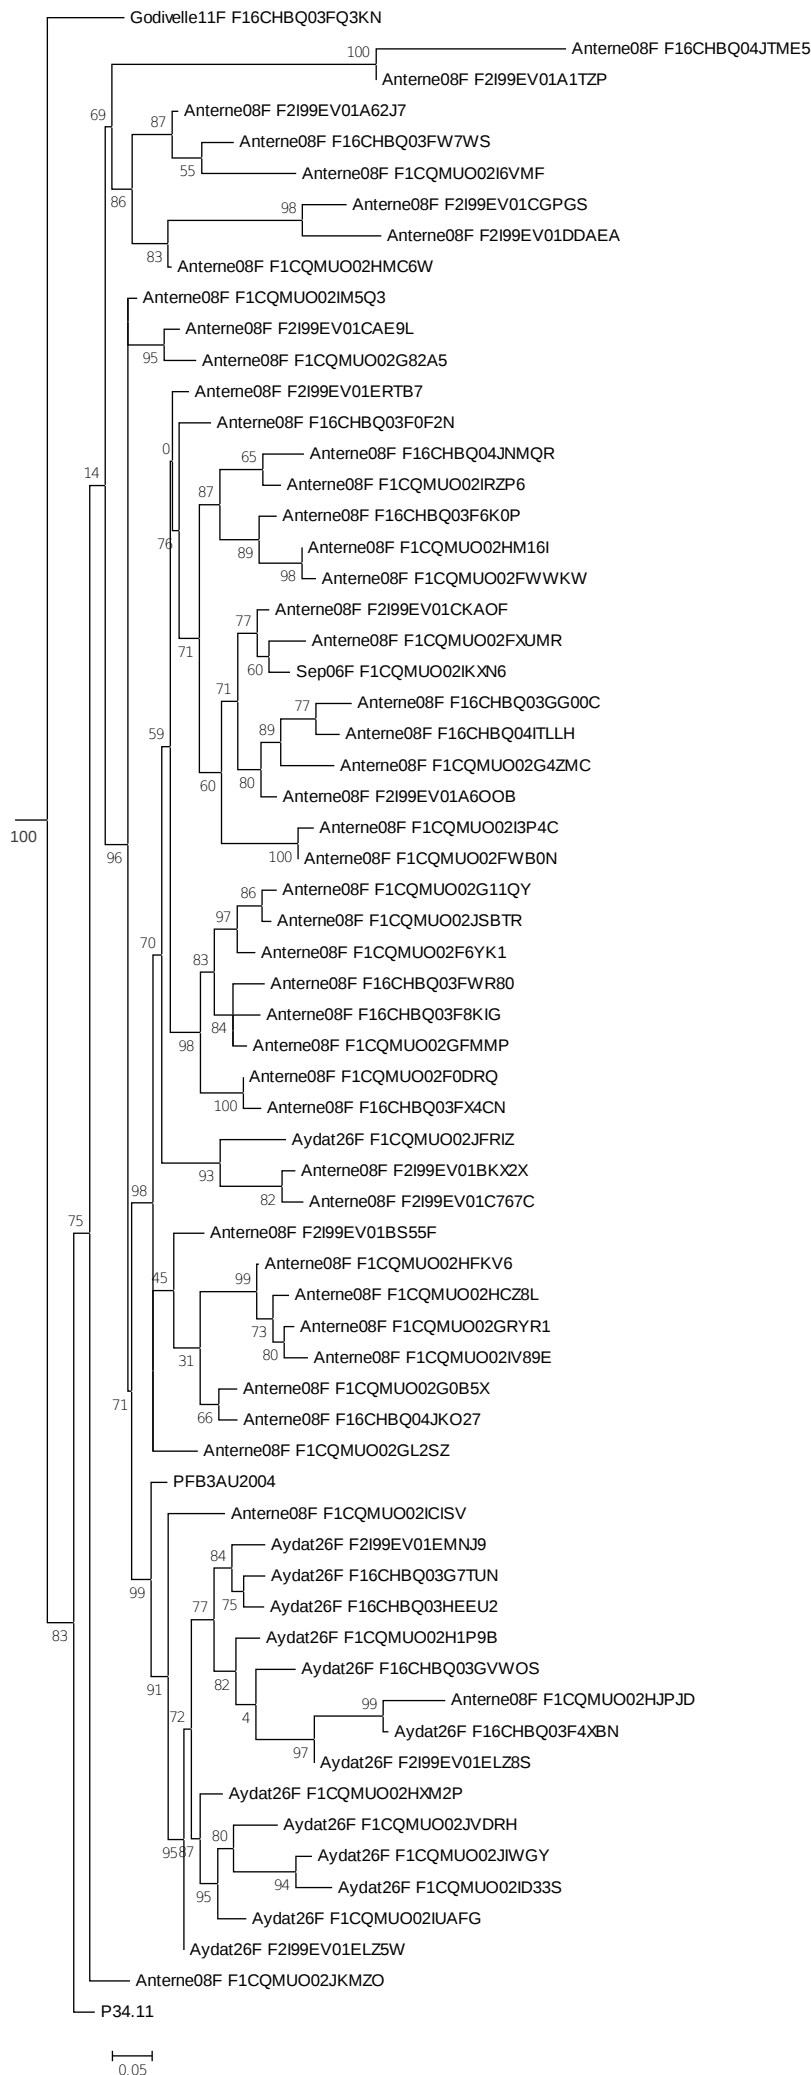

Fig. S3: The Cryptomycota phylogeny displaying the representative OTUs detected in the lakes. A representative OTU can be picked from a particular ecosystem but can be present in all ecosystems sampled as the OTU named Anterne08F F1CQMUI002ICISV.
