# Supplementary material for: Phylogenetic Affiliation of SSU rRNA Genes Generated by Massively Parallel Sequencing: New Insights into the Freshwater Protist Diversity
Source: PubMed Central journal article supplement (PMC3597552; doi:10.1371/journal.pone.0058950), 2013-03-14
Supplement: pone.0058950.s004.pdf [file pone.0058950.s004.pdf]

|                               |                                     | <b>Similarity search</b>                                       | <b>Supervised classification</b>                            | <b>Tree-based methods</b>            |
|-------------------------------|-------------------------------------|----------------------------------------------------------------|-------------------------------------------------------------|--------------------------------------|
| <b>Sequences</b>              | Minimal required length             | ~100 bp                                                        | ~100 bp                                                     | ~400 bp                              |
|                               | Sensitivity to the region           | +                                                              | +                                                           | ++                                   |
| <b>Database</b>               | Sensitivity to the size             | ++                                                             | +++                                                         | +                                    |
|                               | Sensitivity to the defined taxonomy | ++                                                             | +++                                                         | -                                    |
|                               | Training                            | no                                                             | yes                                                         | no                                   |
| <b>Processing needs</b>       | Time                                | ++                                                             | +                                                           | +++                                  |
|                               | Ressources                          | +                                                              | +                                                           | +++                                  |
| <b>Measure of relatedness</b> | Taxonomy                            | E-values ; Similarity<br>The consensus<br>taxonomy of top hits | Scores of confidence<br>The user defined score<br>threshold | Position on the phylogeny<br><br>LCA |
|                               | Description of clades               | no                                                             | no                                                          | yes                                  |

Table S1 : Comparison of the different approaches of taxonomic assignment
