# Supplementary material for: Phylogenetic Affiliation of SSU rRNA Genes Generated by Massively Parallel Sequencing: New Insights into the Freshwater Protist Diversity
Source: PubMed Central journal article supplement (PMC3597552; doi:10.1371/journal.pone.0058950), 2013-03-14
Supplement: pone.0058950.s005.pdf [file pone.0058950.s005.pdf]

| Primer  | Sequence            |
|---------|---------------------|
| NSF4    | CTGGTTGATYCTGCCAGT  |
| NSF370  | AGGGYTCGAYYCCGGAGA  |
| NSF573  | CGCGGTAATTCCAGCTCCA |
| NSF963  | TTRATCAAGAACGAAAGT  |
| NSF1179 | AATTTGACTCAACACGGG  |
| NSF1419 | ATAACAGGTCTGTGATGCC |
| NSR1147 | CCGTCAATYYTTTRAGTTT |

Table S2: The primers names and sequences used in the simulations and pyrosequencing
