# Supplementary material for: Phylogenetic Affiliation of SSU rRNA Genes Generated by Massively Parallel Sequencing: New Insights into the Freshwater Protist Diversity
Source: PubMed Central journal article supplement (PMC3597552; doi:10.1371/journal.pone.0058950), 2013-03-14
Supplement: pone.0058950.s006.pdf [file pone.0058950.s006.pdf]

|                         |                               | #seq         | #OTUs     | Schao1        | Anterne Shannon | Coverage      | #seq        | #OTUs     | Schao1       | Aydat Shannon | Coverage      | #seq       | #OTUs     | Schao1        | Bourget Shannon | Coverage      | #seq        | #OTUs     | Schao1       | Godivelle Shannon | Coverage      |
|-------------------------|-------------------------------|--------------|-----------|---------------|-----------------|---------------|-------------|-----------|--------------|---------------|---------------|------------|-----------|---------------|-----------------|---------------|-------------|-----------|--------------|-------------------|---------------|
| <b>Alveolata</b>        |                               | <b>32</b>    | <b>13</b> | <b>28.00</b>  | <b>2.39</b>     | <b>81.25</b>  | <b>498</b>  | <b>35</b> | <b>50.00</b> | <b>2.72</b>   | <b>97.99</b>  | <b>564</b> | <b>26</b> | <b>39.00</b>  | <b>0.81</b>     | <b>97.52</b>  | <b>2450</b> | <b>50</b> | <b>69.12</b> | <b>1.92</b>       | <b>99.27</b>  |
|                         | Apicomplexa                   | 0            | 0         |               |                 |               | 38          | 2         |              |               |               | 42         | 3         |               |                 |               | 12          | 5         |              |                   |               |
|                         | Ciliophora                    | 29           | 12        |               |                 |               | 245         | 20        |              |               |               | 14         | 9         |               |                 |               | 2278        | 33        |              |                   |               |
|                         | Dinophyceae                   | 3            | 1         |               |                 |               | 183         | 11        |              |               |               | 27         | 11        |               |                 |               | 149         | 10        |              |                   |               |
|                         | Perkinsea                     | 0            | 0         |               |                 |               | 32          | 2         |              |               |               | 481        | 3         |               |                 |               | 11          | 2         |              |                   |               |
| <b>Amoebozoa</b>        |                               | <b>0</b>     | <b>0</b>  | <b>0</b>      | <b>0</b>        | <b>0</b>      | <b>0</b>    | <b>0</b>  | <b>0</b>     | <b>0</b>      | <b>0</b>      | <b>0</b>   | <b>0</b>  | <b>0</b>      | <b>0</b>        | <b>0</b>      | <b>0</b>    | <b>0</b>  | <b>0</b>     | <b>0</b>          | <b>0</b>      |
|                         | Centramoebida                 | 0            | 0         |               |                 |               | 0           | 0         |              |               |               | 0          | 0         |               |                 |               | 0           | 0         |              |                   |               |
|                         | Tubulinea                     | 0            | 0         |               |                 |               | 0           | 0         |              |               |               | 0          | 0         |               |                 |               | 0           | 0         |              |                   |               |
|                         | unclassified Amoebozoa        | 0            | 0         |               |                 |               | 0           | 0         |              |               |               | 0          | 0         |               |                 |               | 0           | 0         |              |                   |               |
| <b>Choanoflagellida</b> |                               | <b>0</b>     | <b>0</b>  |               |                 |               | <b>2</b>    | <b>1</b>  | <b>1.00</b>  | <b>0.00</b>   | <b>100.00</b> | <b>0</b>   | <b>0</b>  | <b>0</b>      | <b>0</b>        | <b>0</b>      | <b>0</b>    | <b>0</b>  | <b>0</b>     | <b>0</b>          | <b>0</b>      |
|                         | unclassified Choanoflagellida | 0            | 0         |               |                 |               | 2           | 1         |              |               |               | 0          | 0         |               |                 |               | 0           | 0         |              |                   |               |
| <b>Cryptophyta</b>      |                               | <b>9</b>     | <b>3</b>  | <b>3.00</b>   | <b>1.00</b>     | <b>100.00</b> | <b>210</b>  | <b>13</b> | <b>23.00</b> | <b>1.23</b>   | <b>97.62</b>  | <b>108</b> | <b>7</b>  | <b>13.00</b>  | <b>0.94</b>     | <b>96.30</b>  | <b>389</b>  | <b>15</b> | <b>17.00</b> | <b>1.51</b>       | <b>98.97</b>  |
|                         | Cryptomonadaceae              | 2            | 1         |               |                 |               | 11          | 2         |              |               |               | 11         | 1         |               |                 |               | 207         | 4         |              |                   |               |
|                         | Cryptophyta nucleomorph       | 0            | 0         |               |                 |               | 4           | 2         |              |               |               | 1          | 1         |               |                 |               | 21          | 4         |              |                   |               |
|                         | Cryptophyta_2                 | 5            | 1         |               |                 |               | 5           | 1         |              |               |               | 0          | 0         |               |                 |               | 10          | 3         |              |                   |               |
|                         | Cryptophyta_3                 | 2            | 1         |               |                 |               | 42          | 4         |              |               |               | 95         | 4         |               |                 |               | 54          | 3         |              |                   |               |
|                         | Cryptophyta_4                 | 0            | 0         |               |                 |               | 148         | 4         |              |               |               | 1          | 1         |               |                 |               | 97          | 1         |              |                   |               |
| <b>Diplomonadida</b>    |                               | <b>1</b>     | <b>1</b>  | <b>1.00</b>   | <b>0.00</b>     | <b>0.00</b>   | <b>2</b>    | <b>2</b>  | <b>3.00</b>  | <b>0.69</b>   | <b>0.00</b>   | <b>14</b>  | <b>5</b>  | <b>5.00</b>   | <b>1.51</b>     | <b>92.86</b>  | <b>0</b>    | <b>0</b>  | <b>0</b>     | <b>0</b>          | <b>0</b>      |
|                         | Hexamitidae                   | 1            | 1         |               |                 |               | 2           | 2         |              |               |               | 14         | 5         |               |                 |               | 0           | 0         |              |                   |               |
| <b>Euglenozoa</b>       |                               | <b>6</b>     | <b>5</b>  | <b>8.00</b>   | <b>1.56</b>     | <b>33.33</b>  | <b>24</b>   | <b>14</b> | <b>18.20</b> | <b>2.54</b>   | <b>70.83</b>  | <b>85</b>  | <b>28</b> | <b>35.86</b>  | <b>2.97</b>     | <b>87.06</b>  | <b>2</b>    | <b>2</b>  | <b>3.00</b>  | <b>0.69</b>       | <b>0.00</b>   |
|                         | Euglenida                     | 6            | 5         |               |                 |               | 24          | 14        |              |               |               | 85         | 28        |               |                 |               | 2           | 2         |              |                   |               |
| <b>Fungi</b>            |                               | <b>16946</b> | <b>75</b> | <b>109.36</b> | <b>1.65</b>     | <b>99.83</b>  | <b>5604</b> | <b>49</b> | <b>68.12</b> | <b>0.70</b>   | <b>99.68</b>  | <b>613</b> | <b>69</b> | <b>115.87</b> | <b>2.06</b>     | <b>93.80</b>  | <b>704</b>  | <b>63</b> | <b>84.08</b> | <b>2.34</b>       | <b>96.73</b>  |
|                         | Chytridiomycota               | 0            | 0         |               |                 |               | 11          | 2         |              |               |               | 3          | 2         |               |                 |               | 6           | 4         |              |                   |               |
|                         | Dikarya                       | 10           | 8         |               |                 |               | 27          | 14        |              |               |               | 80         | 32        |               |                 |               | 80          | 22        |              |                   |               |
|                         | Glomeromycota                 | 0            | 0         |               |                 |               | 0           | 0         |              |               |               | 0          | 0         |               |                 |               | 2           | 1         |              |                   |               |
|                         | LKM11                         | 16893        | 56        |               |                 |               | 5411        | 20        |              |               |               | 20         | 2         |               |                 |               | 27          | 5         |              |                   |               |
|                         | Microsporidia                 | 0            | 0         |               |                 |               | 0           | 0         |              |               |               | 0          | 0         |               |                 |               | 2           | 1         |              |                   |               |
|                         | Rhizophyidium clade           | 1            | 1         |               |                 |               | 1           | 1         |              |               |               | 0          | 0         |               |                 |               | 19          | 4         |              |                   |               |
|                         | Rozella clade                 | 0            | 0         |               |                 |               | 32          | 1         |              |               |               | 0          | 0         |               |                 |               | 8           | 3         |              |                   |               |
|                         | Zygomycota_1 et rel.          | 0            | 0         |               |                 |               | 12          | 1         |              |               |               | 0          | 0         |               |                 |               | 3           | 1         |              |                   |               |
|                         | unclassified Fungi            | 42           | 10        |               |                 |               | 110         | 10        |              |               |               | 510        | 33        |               |                 |               | 557         | 22        |              |                   |               |
| <b>Haptophyceae</b>     |                               | <b>0</b>     | <b>0</b>  | <b>0</b>      | <b>0</b>        | <b>0</b>      | <b>23</b>   | <b>1</b>  | <b>1.00</b>  | <b>0.00</b>   | <b>100.00</b> | <b>24</b>  | <b>1</b>  | <b>1.00</b>   | <b>0.00</b>     | <b>100.00</b> | <b>3</b>    | <b>2</b>  | <b>2.00</b>  | <b>0.64</b>       | <b>66.67</b>  |
|                         | Pavlovales                    | 0            | 0         |               |                 |               | 0           | 0         |              |               |               | 0          | 0         |               |                 |               | 1           | 1         |              |                   |               |
|                         | unclassified Haptophyceae     | 0            | 0         |               |                 |               | 23          | 1         |              |               |               | 24         | 1         |               |                 |               | 2           | 1         |              |                   |               |
| <b>Heterolobosea</b>    |                               | <b>2</b>     | <b>1</b>  | <b>1.00</b>   | <b>0.00</b>     | <b>100.00</b> | <b>0</b>    | <b>0</b>  | <b>0</b>     | <b>0</b>      | <b>0</b>      | <b>0</b>   | <b>0</b>  | <b>0</b>      | <b>0</b>        | <b>0</b>      | <b>0</b>    | <b>0</b>  | <b>0</b>     | <b>0</b>          | <b>0</b>      |
|                         | Schizopyrenida                | 2            | 1         |               |                 |               | 0           | 0         |              |               |               | 0          | 0         |               |                 |               | 0           | 0         |              |                   |               |
| <b>Ichthyosporia</b>    |                               | <b>0</b>     | <b>0</b>  | <b>0</b>      | <b>0</b>        | <b>0</b>      | <b>0</b>    | <b>0</b>  | <b>0</b>     | <b>0</b>      | <b>0</b>      | <b>18</b>  | <b>2</b>  | <b>2.00</b>   | <b>0.45</b>     | <b>100.00</b> | <b>2</b>    | <b>1</b>  | <b>1.00</b>  | <b>0.00</b>       | <b>100.00</b> |
|                         | unclassified Ichthyosporia    | 0            | 0         |               |                 |               | 0           | 0         |              |               |               | 18         | 2         |               |                 |               | 2           | 1         |              |                   |               |
| <b>Parabasalida</b>     |                               | <b>8</b>     | <b>4</b>  | <b>7.00</b>   | <b>1.07</b>     | <b>62.50</b>  | <b>0</b>    | <b>0</b>  | <b>0</b>     | <b>0</b>      | <b>0</b>      | <b>53</b>  | <b>9</b>  | <b>11.00</b>  | <b>1.35</b>     | <b>92.45</b>  | <b>0</b>    | <b>0</b>  | <b>0</b>     | <b>0</b>          | <b>0</b>      |
|                         | Trichomonada                  | 8            | 4         |               |                 |               | 0           | 0         |              |               |               | 53         | 9         |               |                 |               | 0           | 0         |              |                   |               |
| <b>Rhizaria</b>         |                               | <b>9</b>     | <b>6</b>  | <b>9.00</b>   | <b>1.68</b>     | <b>55.56</b>  | <b>183</b>  | <b>13</b> | <b>13.33</b> | <b>1.62</b>   | <b>98.91</b>  | <b>204</b> | <b>22</b> | <b>31.00</b>  | <b>1.69</b>     | <b>95.10</b>  | <b>202</b>  | <b>15</b> | <b>25.50</b> | <b>1.62</b>       | <b>96.53</b>  |
|                         | Cercozoa                      | 4            | 2         |               |                 |               | 173         | 10        |              |               |               | 168        | 6         |               |                 |               | 201         | 14        |              |                   |               |
|                         | Foraminifera                  | 5            | 4         |               |                 |               | 10          | 3         |              |               |               | 36         | 16        |               |                 |               | 1           | 1         |              |                   |               |
| <b>Rhodophyta</b>       |                               | <b>1</b>     | <b>1</b>  | <b>1.00</b>   | <b>0</b>        | <b>0</b>      | <b>1</b>    | <b>1</b>  | <b>1.00</b>  | <b>0.00</b>   | <b>0.00</b>   | <b>23</b>  | <b>7</b>  | <b>10.00</b>  | <b>1.57</b>     | <b>87.00</b>  | <b>0</b>    | <b>0</b>  | <b>0</b>     | <b>0</b>          | <b>0</b>      |
|                         | Florideophyceae               | 0            | 0         |               |                 |               | 1           | 1         |              |               |               | 0          | 0         |               |                 |               | 0           | 0         |              |                   |               |
|                         | Bangiophyceae                 | 1            | 1         |               |                 |               | 0           | 0         |              |               |               | 23         | 7         |               |                 |               | 0           | 0         |              |                   |               |
| <b>Viridiplantae</b>    |                               | <b>4</b>     | <b>4</b>  | <b>7.00</b>   | <b>1.10</b>     | <b>0.00</b>   | <b>260</b>  | <b>16</b> | <b>18.00</b> | <b>1.80</b>   | <b>98.46</b>  | <b>1</b>   | <b>1</b>  | <b>1.00</b>   | <b>0.00</b>     | <b>0.00</b>   | <b>235</b>  | <b>12</b> | <b>14.00</b> | <b>1.56</b>       | <b>98.71</b>  |
|                         | Chlorophyta                   | 3            | 3         |               |                 |               | 259         | 15        |              |               |               | 1          | 1         |               |                 |               | 233         | 10        |              |                   |               |
|                         | Streptophyta                  | 1            | 1         |               |                 |               | 1           | 1         |              |               |               | 0          | 0         |               |                 |               | 2           | 2         |              |                   |               |
| <b>stramenopiles</b>    |                               | <b>21</b>    | <b>12</b> | <b>30.00</b>  | <b>2.17</b>     | <b>57.14</b>  | <b>785</b>  | <b>39</b> | <b>50.00</b> | <b>2.42</b>   | <b>98.60</b>  | <b>930</b> | <b>42</b> | <b>53.00</b>  | <b>2.84</b>     | <b>98.71</b>  | <b>2700</b> | <b>83</b> | <b>86.93</b> | <b>3.36</b>       | <b>99.59</b>  |
|                         | Bacillariophyta               | 7            | 1         |               |                 |               | 14          | 2         |              |               |               | 0          | 0         |               |                 |               | 14          | 5         |              |                   |               |
|                         | Bicosoecida                   | 1            | 1         |               |                 |               | 1           | 1         |              |               |               | 187        | 16        |               |                 |               | 364         | 21        |              |                   |               |
|                         | Chrysophyceae                 | 9            | 6         |               |                 |               | 221         | 16        |              |               |               | 489        | 12        |               |                 |               | 1908        | 37        |              |                   |               |
|                         | Dictyochophyceae              | 1            | 1         |               |                 |               | 32          | 6         |              |               |               | 17         | 3         |               |                 |               | 280         | 9         |              |                   |               |
|                         | Eustigmatophyceae             | 2            | 2         |               |                 |               | 270         | 2         |              |               |               | 0          | 0         |               |                 |               | 0           | 0         |              |                   |               |
|                         | Labyrinthulida                | 0            | 0         |               |                 |               | 15          | 3         |              |               |               | 32         | 3         |               |                 |               | 55          | 4         |              |                   |               |
|                         | Oomycetes                     | 0            | 0         |               |                 |               | 91          | 3         |              |               |               | 65         | 3         |               |                 |               | 3           | 1         |              |                   |               |
|                         | unclassified stramenopiles    | 1            | 1         |               |                 |               | 141         | 6         |              |               |               | 140        | 5         |               |                 |               | 76          | 6         |              |                   |               |

Tab. S3 : Main taxonomic groups with richness and diversity indices in the different lakes studied

|                         |                               | #seq         | #OTUs     | Schao1        | Anterne Shannon | Coverage      | #seq        | #OTUs     | Schao1       | Aydat Shannon | Coverage      | #seq       | #OTUs     | Schao1        | Bourget Shannon | Coverage      | #seq        | #OTUs     | Schao1       | Godivelle Shannon | Coverage      |
|-------------------------|-------------------------------|--------------|-----------|---------------|-----------------|---------------|-------------|-----------|--------------|---------------|---------------|------------|-----------|---------------|-----------------|---------------|-------------|-----------|--------------|-------------------|---------------|
| <b>Alveolata</b>        |                               | <b>32</b>    | <b>13</b> | <b>28.00</b>  | <b>2.39</b>     | <b>81.25</b>  | <b>498</b>  | <b>35</b> | <b>50.00</b> | <b>2.72</b>   | <b>97.99</b>  | <b>564</b> | <b>26</b> | <b>39.00</b>  | <b>0.81</b>     | <b>97.52</b>  | <b>2450</b> | <b>50</b> | <b>69.12</b> | <b>1.92</b>       | <b>99.27</b>  |
|                         | Apicomplexa                   | 0            | 0         |               |                 |               | 38          | 2         |              |               |               | 42         | 3         |               |                 |               | 12          | 5         |              |                   |               |
|                         | Ciliophora                    | 29           | 12        |               |                 |               | 245         | 20        |              |               |               | 14         | 9         |               |                 |               | 2278        | 33        |              |                   |               |
|                         | Dinophyceae                   | 3            | 1         |               |                 |               | 183         | 11        |              |               |               | 27         | 11        |               |                 |               | 149         | 10        |              |                   |               |
|                         | Perkinsea                     | 0            | 0         |               |                 |               | 32          | 2         |              |               |               | 481        | 3         |               |                 |               | 11          | 2         |              |                   |               |
| <b>Amoebozoa</b>        |                               | <b>0</b>     | <b>0</b>  | <b>0</b>      | <b>0</b>        | <b>0</b>      | <b>0</b>    | <b>0</b>  | <b>0</b>     | <b>0</b>      | <b>0</b>      | <b>0</b>   | <b>0</b>  | <b>0</b>      | <b>0</b>        | <b>0</b>      | <b>0</b>    | <b>0</b>  | <b>0</b>     | <b>0</b>          | <b>0</b>      |
|                         | Centramoebida                 | 0            | 0         |               |                 |               | 0           | 0         |              |               |               | 0          | 0         |               |                 |               | 0           | 0         |              |                   |               |
|                         | Tubulinea                     | 0            | 0         |               |                 |               | 0           | 0         |              |               |               | 0          | 0         |               |                 |               | 0           | 0         |              |                   |               |
|                         | unclassified Amoebozoa        | 0            | 0         |               |                 |               | 0           | 0         |              |               |               | 0          | 0         |               |                 |               | 0           | 0         |              |                   |               |
| <b>Choanoflagellida</b> |                               | <b>0</b>     | <b>0</b>  |               |                 |               | <b>2</b>    | <b>1</b>  | <b>1.00</b>  | <b>0.00</b>   | <b>100.00</b> | <b>0</b>   | <b>0</b>  | <b>0</b>      | <b>0</b>        | <b>0</b>      | <b>0</b>    | <b>0</b>  | <b>0</b>     | <b>0</b>          | <b>0</b>      |
|                         | unclassified Choanoflagellida | 0            | 0         |               |                 |               | 2           | 1         |              |               |               | 0          | 0         |               |                 |               | 0           | 0         |              |                   |               |
| <b>Cryptophyta</b>      |                               | <b>9</b>     | <b>3</b>  | <b>3.00</b>   | <b>1.00</b>     | <b>100.00</b> | <b>210</b>  | <b>13</b> | <b>23.00</b> | <b>1.23</b>   | <b>97.62</b>  | <b>108</b> | <b>7</b>  | <b>13.00</b>  | <b>0.94</b>     | <b>96.30</b>  | <b>389</b>  | <b>15</b> | <b>17.00</b> | <b>1.51</b>       | <b>98.97</b>  |
|                         | Cryptomonadaceae              | 2            | 1         |               |                 |               | 11          | 2         |              |               |               | 11         | 1         |               |                 |               | 207         | 4         |              |                   |               |
|                         | Cryptophyta nucleomorph       | 0            | 0         |               |                 |               | 4           | 2         |              |               |               | 1          | 1         |               |                 |               | 21          | 4         |              |                   |               |
|                         | Cryptophyta_2                 | 5            | 1         |               |                 |               | 5           | 1         |              |               |               | 0          | 0         |               |                 |               | 10          | 3         |              |                   |               |
|                         | Cryptophyta_3                 | 2            | 1         |               |                 |               | 42          | 4         |              |               |               | 95         | 4         |               |                 |               | 54          | 3         |              |                   |               |
|                         | Cryptophyta_4                 | 0            | 0         |               |                 |               | 148         | 4         |              |               |               | 1          | 1         |               |                 |               | 97          | 1         |              |                   |               |
| <b>Diplomonadida</b>    |                               | <b>1</b>     | <b>1</b>  | <b>1.00</b>   | <b>0.00</b>     | <b>0.00</b>   | <b>2</b>    | <b>2</b>  | <b>3.00</b>  | <b>0.69</b>   | <b>0.00</b>   | <b>14</b>  | <b>5</b>  | <b>5.00</b>   | <b>1.51</b>     | <b>92.86</b>  | <b>0</b>    | <b>0</b>  | <b>0</b>     | <b>0</b>          | <b>0</b>      |
|                         | Hexamitidae                   | 1            | 1         |               |                 |               | 2           | 2         |              |               |               | 14         | 5         |               |                 |               | 0           | 0         |              |                   |               |
| <b>Euglenozoa</b>       |                               | <b>6</b>     | <b>5</b>  | <b>8.00</b>   | <b>1.56</b>     | <b>33.33</b>  | <b>24</b>   | <b>14</b> | <b>18.20</b> | <b>2.54</b>   | <b>70.83</b>  | <b>85</b>  | <b>28</b> | <b>35.86</b>  | <b>2.97</b>     | <b>87.06</b>  | <b>2</b>    | <b>2</b>  | <b>3.00</b>  | <b>0.69</b>       | <b>0.00</b>   |
|                         | Euglenida                     | 6            | 5         |               |                 |               | 24          | 14        |              |               |               | 85         | 28        |               |                 |               | 2           | 2         |              |                   |               |
| <b>Fungi</b>            |                               | <b>16946</b> | <b>75</b> | <b>109.36</b> | <b>1.65</b>     | <b>99.83</b>  | <b>5604</b> | <b>49</b> | <b>68.12</b> | <b>0.70</b>   | <b>99.68</b>  | <b>613</b> | <b>69</b> | <b>115.87</b> | <b>2.06</b>     | <b>93.80</b>  | <b>704</b>  | <b>63</b> | <b>84.08</b> | <b>2.34</b>       | <b>96.73</b>  |
|                         | Chytridiomycota               | 0            | 0         |               |                 |               | 11          | 2         |              |               |               | 3          | 2         |               |                 |               | 6           | 4         |              |                   |               |
|                         | Dikarya                       | 10           | 8         |               |                 |               | 27          | 14        |              |               |               | 80         | 32        |               |                 |               | 80          | 22        |              |                   |               |
|                         | Glomeromycota                 | 0            | 0         |               |                 |               | 0           | 0         |              |               |               | 0          | 0         |               |                 |               | 2           | 1         |              |                   |               |
|                         | LKM11                         | 16893        | 56        |               |                 |               | 5411        | 20        |              |               |               | 20         | 2         |               |                 |               | 27          | 5         |              |                   |               |
|                         | Microsporidia                 | 0            | 0         |               |                 |               | 0           | 0         |              |               |               | 0          | 0         |               |                 |               | 2           | 1         |              |                   |               |
|                         | Rhizophyidium clade           | 1            | 1         |               |                 |               | 1           | 1         |              |               |               | 0          | 0         |               |                 |               | 19          | 4         |              |                   |               |
|                         | Rozella clade                 | 0            | 0         |               |                 |               | 32          | 1         |              |               |               | 0          | 0         |               |                 |               | 8           | 3         |              |                   |               |
|                         | Zygomycota_1 et rel.          | 0            | 0         |               |                 |               | 12          | 1         |              |               |               | 0          | 0         |               |                 |               | 3           | 1         |              |                   |               |
|                         | unclassified Fungi            | 42           | 10        |               |                 |               | 110         | 10        |              |               |               | 510        | 33        |               |                 |               | 557         | 22        |              |                   |               |
| <b>Haptophyceae</b>     |                               | <b>0</b>     | <b>0</b>  | <b>0</b>      | <b>0</b>        | <b>0</b>      | <b>23</b>   | <b>1</b>  | <b>1.00</b>  | <b>0.00</b>   | <b>100.00</b> | <b>24</b>  | <b>1</b>  | <b>1.00</b>   | <b>0.00</b>     | <b>100.00</b> | <b>3</b>    | <b>2</b>  | <b>2.00</b>  | <b>0.64</b>       | <b>66.67</b>  |
|                         | Pavlovales                    | 0            | 0         |               |                 |               | 0           | 0         |              |               |               | 0          | 0         |               |                 |               | 1           | 1         |              |                   |               |
|                         | unclassified Haptophyceae     | 0            | 0         |               |                 |               | 23          | 1         |              |               |               | 24         | 1         |               |                 |               | 2           | 1         |              |                   |               |
| <b>Heterolobosea</b>    |                               | <b>2</b>     | <b>1</b>  | <b>1.00</b>   | <b>0.00</b>     | <b>100.00</b> | <b>0</b>    | <b>0</b>  | <b>0</b>     | <b>0</b>      | <b>0</b>      | <b>0</b>   | <b>0</b>  | <b>0</b>      | <b>0</b>        | <b>0</b>      | <b>0</b>    | <b>0</b>  | <b>0</b>     | <b>0</b>          | <b>0</b>      |
|                         | Schizopyrenida                | 2            | 1         |               |                 |               | 0           | 0         |              |               |               | 0          | 0         |               |                 |               | 0           | 0         |              |                   |               |
| <b>Ichthyosporia</b>    |                               | <b>0</b>     | <b>0</b>  | <b>0</b>      | <b>0</b>        | <b>0</b>      | <b>0</b>    | <b>0</b>  | <b>0</b>     | <b>0</b>      | <b>0</b>      | <b>18</b>  | <b>2</b>  | <b>2.00</b>   | <b>0.45</b>     | <b>100.00</b> | <b>2</b>    | <b>1</b>  | <b>1.00</b>  | <b>0.00</b>       | <b>100.00</b> |
|                         | unclassified Ichthyosporia    | 0            | 0         |               |                 |               | 0           | 0         |              |               |               | 18         | 2         |               |                 |               | 2           | 1         |              |                   |               |
| <b>Parabasalida</b>     |                               | <b>8</b>     | <b>4</b>  | <b>7.00</b>   | <b>1.07</b>     | <b>62.50</b>  | <b>0</b>    | <b>0</b>  | <b>0</b>     | <b>0</b>      | <b>0</b>      | <b>53</b>  | <b>9</b>  | <b>11.00</b>  | <b>1.35</b>     | <b>92.45</b>  | <b>0</b>    | <b>0</b>  | <b>0</b>     | <b>0</b>          | <b>0</b>      |
|                         | Trichomonada                  | 8            | 4         |               |                 |               | 0           | 0         |              |               |               | 53         | 9         |               |                 |               | 0           | 0         |              |                   |               |
| <b>Rhizaria</b>         |                               | <b>9</b>     | <b>6</b>  | <b>9.00</b>   | <b>1.68</b>     | <b>55.56</b>  | <b>183</b>  | <b>13</b> | <b>13.33</b> | <b>1.62</b>   | <b>98.91</b>  | <b>204</b> | <b>22</b> | <b>31.00</b>  | <b>1.69</b>     | <b>95.10</b>  | <b>202</b>  | <b>15</b> | <b>25.50</b> | <b>1.62</b>       | <b>96.53</b>  |
|                         | Cercozoa                      | 4            | 2         |               |                 |               | 173         | 10        |              |               |               | 168        | 6         |               |                 |               | 201         | 14        |              |                   |               |
|                         | Foraminifera                  | 5            | 4         |               |                 |               | 10          | 3         |              |               |               | 36         | 16        |               |                 |               | 1           | 1         |              |                   |               |
| <b>Rhodophyta</b>       |                               | <b>1</b>     | <b>1</b>  | <b>1.00</b>   | <b>0</b>        | <b>0</b>      | <b>1</b>    | <b>1</b>  | <b>1.00</b>  | <b>0.00</b>   | <b>0.00</b>   | <b>23</b>  | <b>7</b>  | <b>10.00</b>  | <b>1.57</b>     | <b>87.00</b>  | <b>0</b>    | <b>0</b>  | <b>0</b>     | <b>0</b>          | <b>0</b>      |
|                         | Florideophyceae               | 0            | 0         |               |                 |               | 1           | 1         |              |               |               | 0          | 0         |               |                 |               | 0           | 0         |              |                   |               |
|                         | Bangiophyceae                 | 1            | 1         |               |                 |               | 0           | 0         |              |               |               | 23         | 7         |               |                 |               | 0           | 0         |              |                   |               |
| <b>Viridiplantae</b>    |                               | <b>4</b>     | <b>4</b>  | <b>7.00</b>   | <b>1.10</b>     | <b>0.00</b>   | <b>260</b>  | <b>16</b> | <b>18.00</b> | <b>1.80</b>   | <b>98.46</b>  | <b>1</b>   | <b>1</b>  | <b>1.00</b>   | <b>0.00</b>     | <b>0.00</b>   | <b>235</b>  | <b>12</b> | <b>14.00</b> | <b>1.56</b>       | <b>98.71</b>  |
|                         | Chlorophyta                   | 3            | 3         |               |                 |               | 259         | 15        |              |               |               | 1          | 1         |               |                 |               | 233         | 10        |              |                   |               |
|                         | Streptophyta                  | 1            | 1         |               |                 |               | 1           | 1         |              |               |               | 0          | 0         |               |                 |               | 2           | 2         |              |                   |               |
| <b>stramenopiles</b>    |                               | <b>21</b>    | <b>12</b> | <b>30.00</b>  | <b>2.17</b>     | <b>57.14</b>  | <b>785</b>  | <b>39</b> | <b>50.00</b> | <b>2.42</b>   | <b>98.60</b>  | <b>930</b> | <b>42</b> | <b>53.00</b>  | <b>2.84</b>     | <b>98.71</b>  | <b>2700</b> | <b>83</b> | <b>86.93</b> | <b>3.36</b>       | <b>99.59</b>  |
|                         | Bacillariophyta               | 7            | 1         |               |                 |               | 14          | 2         |              |               |               | 0          | 0         |               |                 |               | 14          | 5         |              |                   |               |
|                         | Bicosoecida                   | 1            | 1         |               |                 |               | 1           | 1         |              |               |               | 187        | 16        |               |                 |               | 364         | 21        |              |                   |               |
|                         | Chrysophyceae                 | 9            | 6         |               |                 |               | 221         | 16        |              |               |               | 489        | 12        |               |                 |               | 1908        | 37        |              |                   |               |
|                         | Dictyochophyceae              | 1            | 1         |               |                 |               | 32          | 6         |              |               |               | 17         | 3         |               |                 |               | 280         | 9         |              |                   |               |
|                         | Eustigmatophyceae             | 2            | 2         |               |                 |               | 270         | 2         |              |               |               | 0          | 0         |               |                 |               | 0           | 0         |              |                   |               |
|                         | Labyrinthulida                | 0            | 0         |               |                 |               | 15          | 3         |              |               |               | 32         | 3         |               |                 |               | 55          | 4         |              |                   |               |
|                         | Oomycetes                     | 0            | 0         |               |                 |               | 91          | 3         |              |               |               | 65         | 3         |               |                 |               | 3           | 1         |              |                   |               |
|                         | unclassified stramenopiles    | 1            | 1         |               |                 |               | 141         | 6         |              |               |               | 140        | 5         |               |                 |               | 76          | 6         |              |                   |               |

Tab. S3 : Main taxonomic groups with richness and diversity indices in the different lakes studied
